# Supplementary material for: Risk stratification by minimal residual disease detection and ctDNA dynamics from personalised assays in stage II-III colorectal cancer in a UK multi-centre prospective study (TRACC Part B)
Source: Research Square preprint supplement (doi:10.21203/rs.3.rs-8574150/v1), 2026-02-10
Supplement: Supplementary file 1 [file b6778c96923627ee14628669.docx]

**Risk stratification by minimal residual disease detection and ctDNA dynamics from personalised assays in stage II-III colorectal cancer in a UK multi-centre prospective study (TRACC Part B)**

**Supplementary Materials**

**Tables**

**Supplementary Table 1: Patients with recurrence (*n*=30)**

| **Patient number** | **Stage** | **Primary tumour location** | **Cancer therapy type** | **ACT after surgery** | **Duration of ACT (weeks)** | **Time to relapse from surgery (months)** | **Time to relapse from end of ACT (months)** | **Site of relapse** | **CEA at relapse (ug/L)** |
| --- | --- | --- | --- | --- | --- | --- | --- | --- | --- |
| 7 | II | Colon | Surgery alone | None | NA | 13 | NA | Lung | 5 |
| 13 | II | Rectum | Surgery + ACT | Raltitrexed | 22 | 38 | 31 | Liver | 5 |
| 17 | II | Colon | Surgery + ACT | FOLFOX | 22 | 24 | 17 | Local | 10 |
| 18 | II | Colon | Surgery + ACT | Capecitabine | 23 | 19 | 10 | Anastomotic site | 3 |
| 30 | II | Colon | Surgery + ACT | Capecitabine | 15 | 24 | 19 | Peritoneum | 26 |
| 45 | II | Colon | Surgery alone | None | NA | 15 | NA | Liver | 16 |
| 50 | II | Rectum | Surgery + ACT | CAPOX | 6 | 19 | 15 | Liver | Not available |
| 51 | II | Colon | Surgery alone | None | NA | 3 | NA | Liver | Not available |
| 55 | III | Colon | Surgery alone | None | NA | 34 | NA | Lung and distant nodes | Not available |
| 56 | III | Colon | Surgery alone | None | NA | 2 | NA | Distant lymph nodes | 3 |
| 62 | III | Rectum | RT+ Surgery+ ACT | CAPOX | 9 | 26 | 22 | Rectum | 6 |
| 70 | III | Rectum | CRT + Surgery+ ACT | CAPOX | 9 | 15 | 10 | Lung | 1 |
| 72 | III | Rectum | CRT + Surgery+ ACT | Capecitabine | 23 | 37 | 29 | Lung | 6 |
| 73 | III | Colon | Surgery + ACT | Capecitabine | 22 | 24 | 18 | Liver, peritoneum | 1 |
| 80 | III | Colon | Surgery + ACT | Capecitabine | 23 | 12 | 6 | Peritoneum, distant lymph nodes | 11 |
| 81 | III | Rectum | CRT + surgery + ACT | CAPOX | 9 | 34 | 30 | Lung | 7 |
| 83 | III | Colon | Surgery alone | None | NA | 23 | NA | Liver | 2 |
| 89 | III | Rectum | CRT + Surgery | None | NA | 2 | NA | Liver, lung | 62 |
| 95 | III | Colon | Surgery + ACT | FOLFOX | 6 | 7 | 2 | Liver | 3.3 |
| 99 | III | Colon | Surgery alone | None | NA | 1 | NA | Peritoneum, mesenteric lymph nodes | 2 |
| 100 | III | Rectum | CRT + Surgery+ ACT | FOLFOX | 10 | 14 | 9 | Liver | 2 |
| 101 | III | Rectum | CRT + surgery | Yes, NA | NA | 4 | NA | Lung | 0 |
| 102 | III | Rectum | CRT + Surgery | None | NA | 2 | NA | Liver | 75 |
| 104 | III | Rectum | CRT + Surgery+ ACT | Capecitabine | 13 | 14 | 7 | Lung, pelvis | 8 |
| 105 | III | Colon | Surgery + ACT | Capecitabine | 9 | 7 | 3 | Liver | 40 |
| 106 | III | Rectum | CRT + Surgery | None | NA | 11 | NA | Lung | 1 |
| 108 | III | Rectum | Surgery + ACT | Capecitabine | 12 | 25 | 20 | Lung | 2 |
| 112 | III | Colon | Surgery + ACT | FOLFOX | 1 | 9 | 6 | Lung | 28.4 |
| 115 | III | Rectum | Surgery alone | None | NA | 2 | NA | Liver | 45.5 |
| 114 | III | Colon | Surgery + ACT | Oxaliplatin + modified deGramont | 23 | 8 | 1 | Liver, peritoneum, omentum, paracolic gutter, ovaries | 10 |

*ACT, adjuvant chemotherapy; CAPOX, capecitabine plus oxaliplatin; CEA, carcinoembryonic antigen (CEA reference range: <4ug/L [non-smokers] <6ug/L [smokers]); CRT, chemoradiotherapy; FOLFOX, 5-fluorouracil plus oxaliplatin; MRD, minimal residual disease; RT, radiotherapy.*

**Figures**

**Supplementary Figure 1: Consort diagram**

Patients with stage II or III CRC who underwent surgery (+/- neo-adjuvant CRT), *n*=122

Evaluable plasma samples

Baseline, *n*=116

Post-surgery, *n*=116

Month 3, *n*=30

Month 6, *n*=21

Month 9, *n*=24

Month 12, *n*=18

Month 18, *n*=19

Month 24, *n*=15

Month 30, *n*=30

Month 36, *n*=6

Month 48, *n*=2

Relapse, n=5

Primary tumour samples collected, *n*=122

Chemotherapy Details

Neo-adjuvant CRT, *n*=23

ACT, *n*=63

Single agent capecitabine, *n*=21

Doublet chemotherapy with oxaliplatin, *n*=35

Other, *n*=7

WES QC Pass, *n*=116


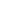


*ACT, adjuvant chemotherapy; CRC, colorectal cancer; CRT, chemoradiotherapy; QC, quality control; WES, whole exome sequencing*

**Supplementary Figure 2: cfDNA concentration at different timepoints**

**
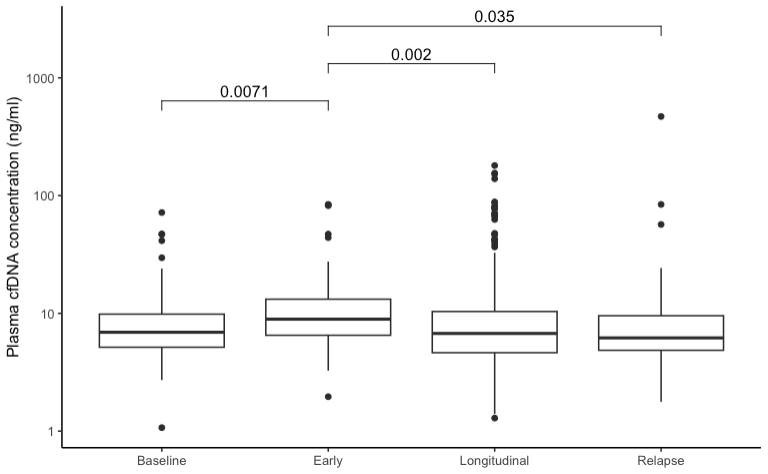
**

**Early samples were those taken <28 days after surgery*

**Supplementary Figure 3a: Multivariate regression model for RFS (stage II) (*n*=52)**


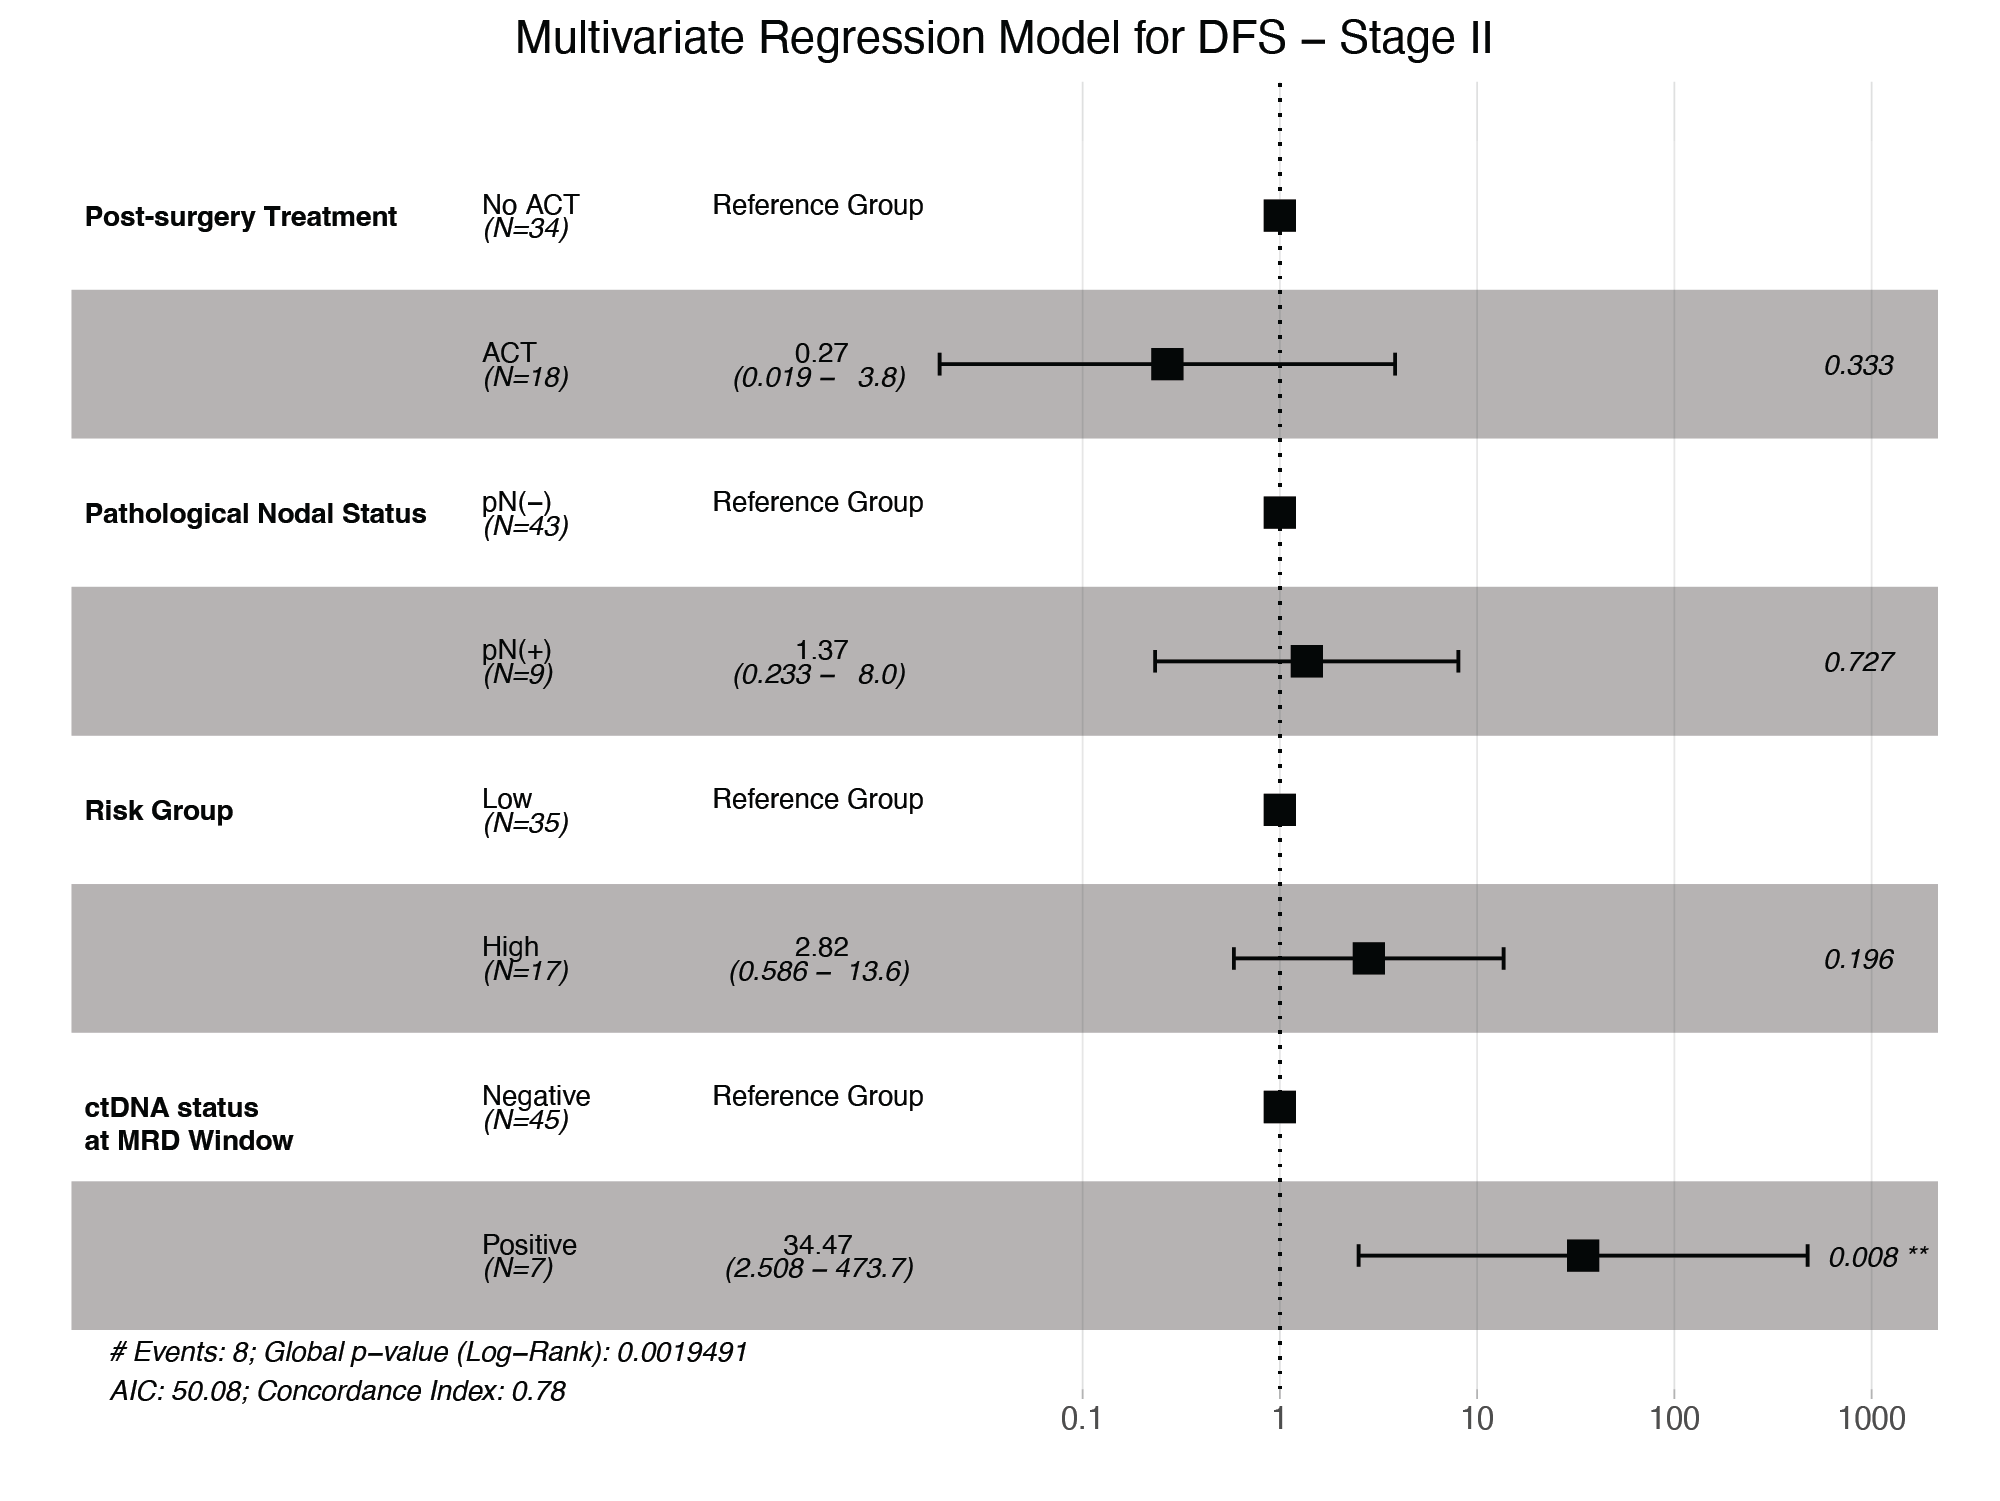


*MRD, minimal residual disease*

**Supplementary Figure 3b: Multivariate regression model for RFS (stage III) (*n*=64)**


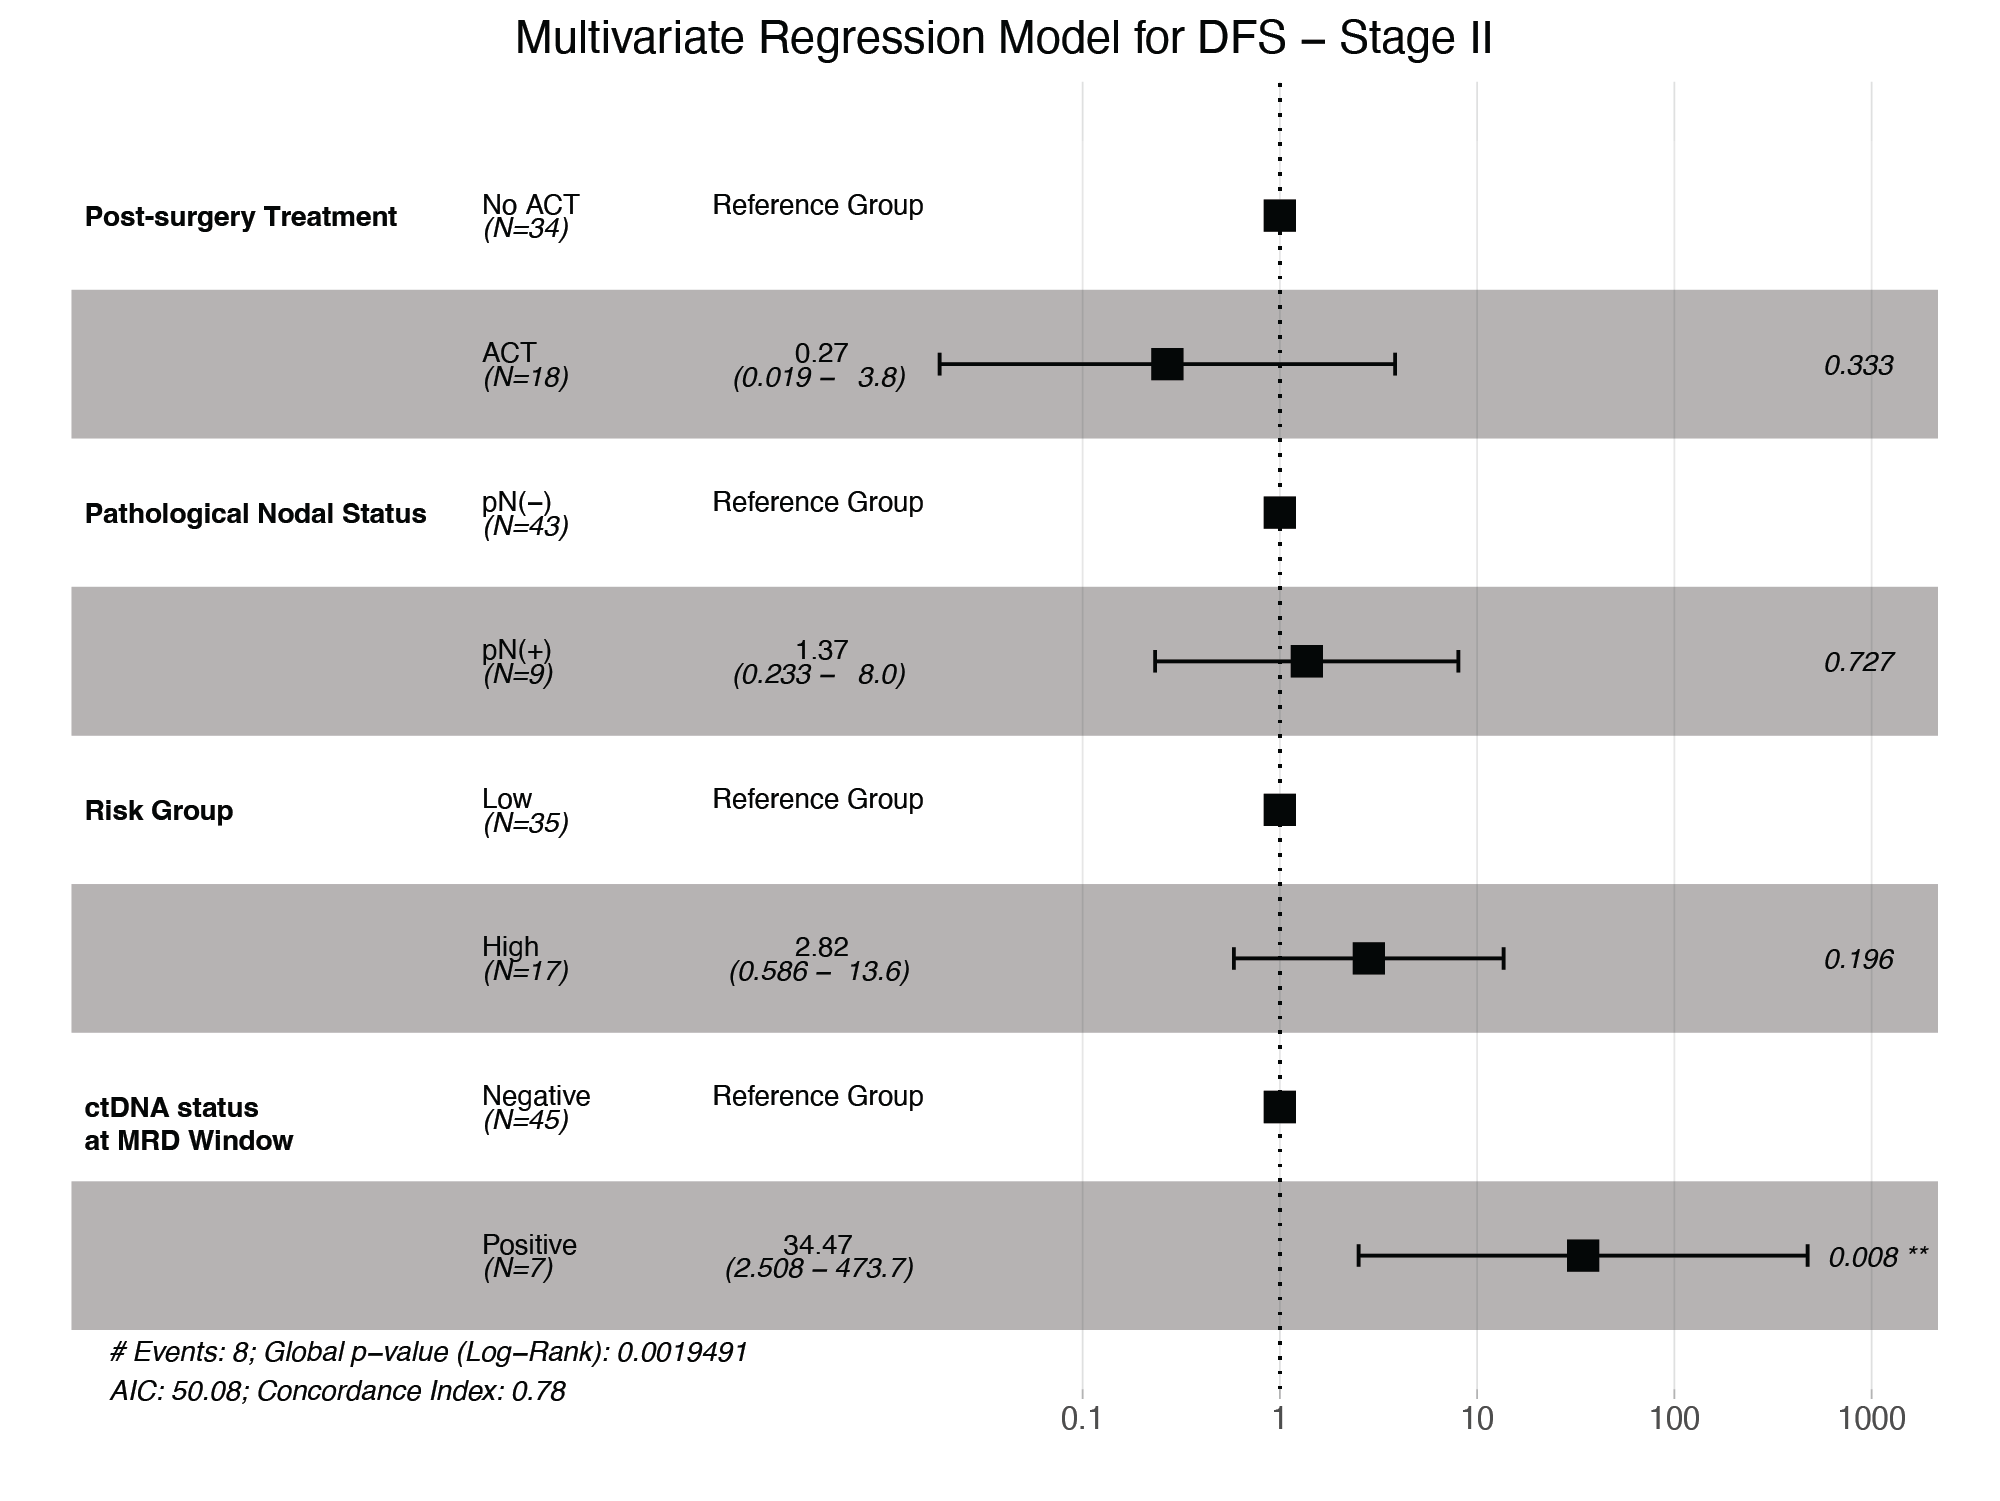


*MRD, minimal residual disease*

**Supplementary Figure 4a: RFS in high risk MRDpos patients according to ACT administration**


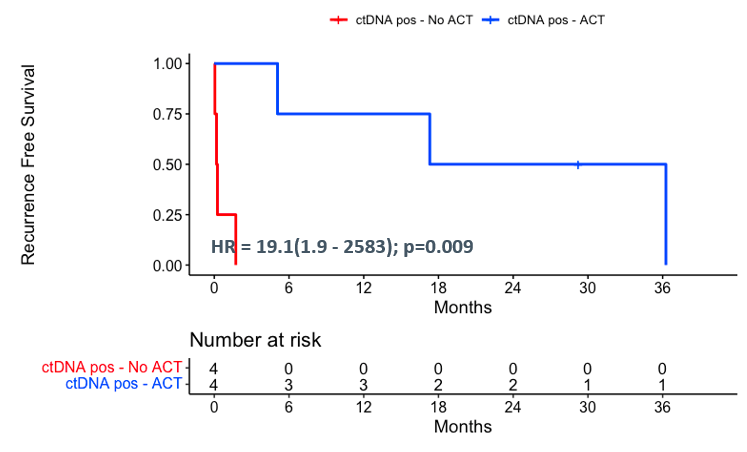


*ACT, adjuvant chemotherapy; HR, hazard ratio; MRDpos, minimal residual disease positive; neg, negative; pos, positive*

**Supplementary Figure 4b: RFS in high risk MRDneg patients according to ACT administration**


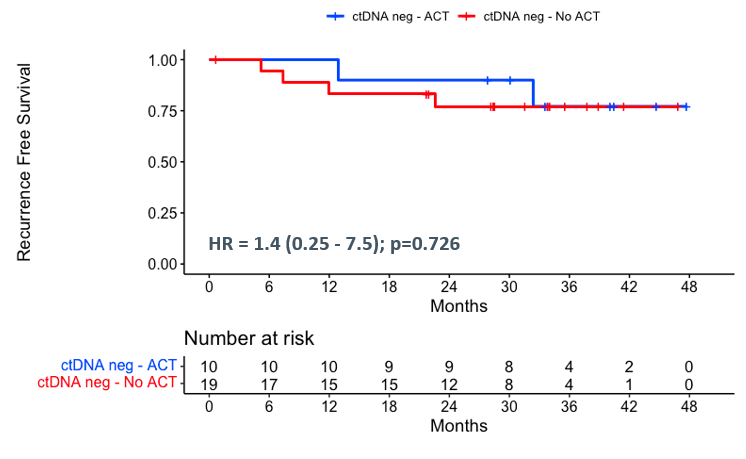


*ACT, adjuvant chemotherapy; HR, hazard ratio; MRDneg, minimal residual disease negative; neg, negative; pos, positive*

**Supplementary Figure 5: ctDNA concentration at baseline stratified by (a) T-stage, (b) N-stage, (c) extramural invasion and (d) perineural invasion**

**
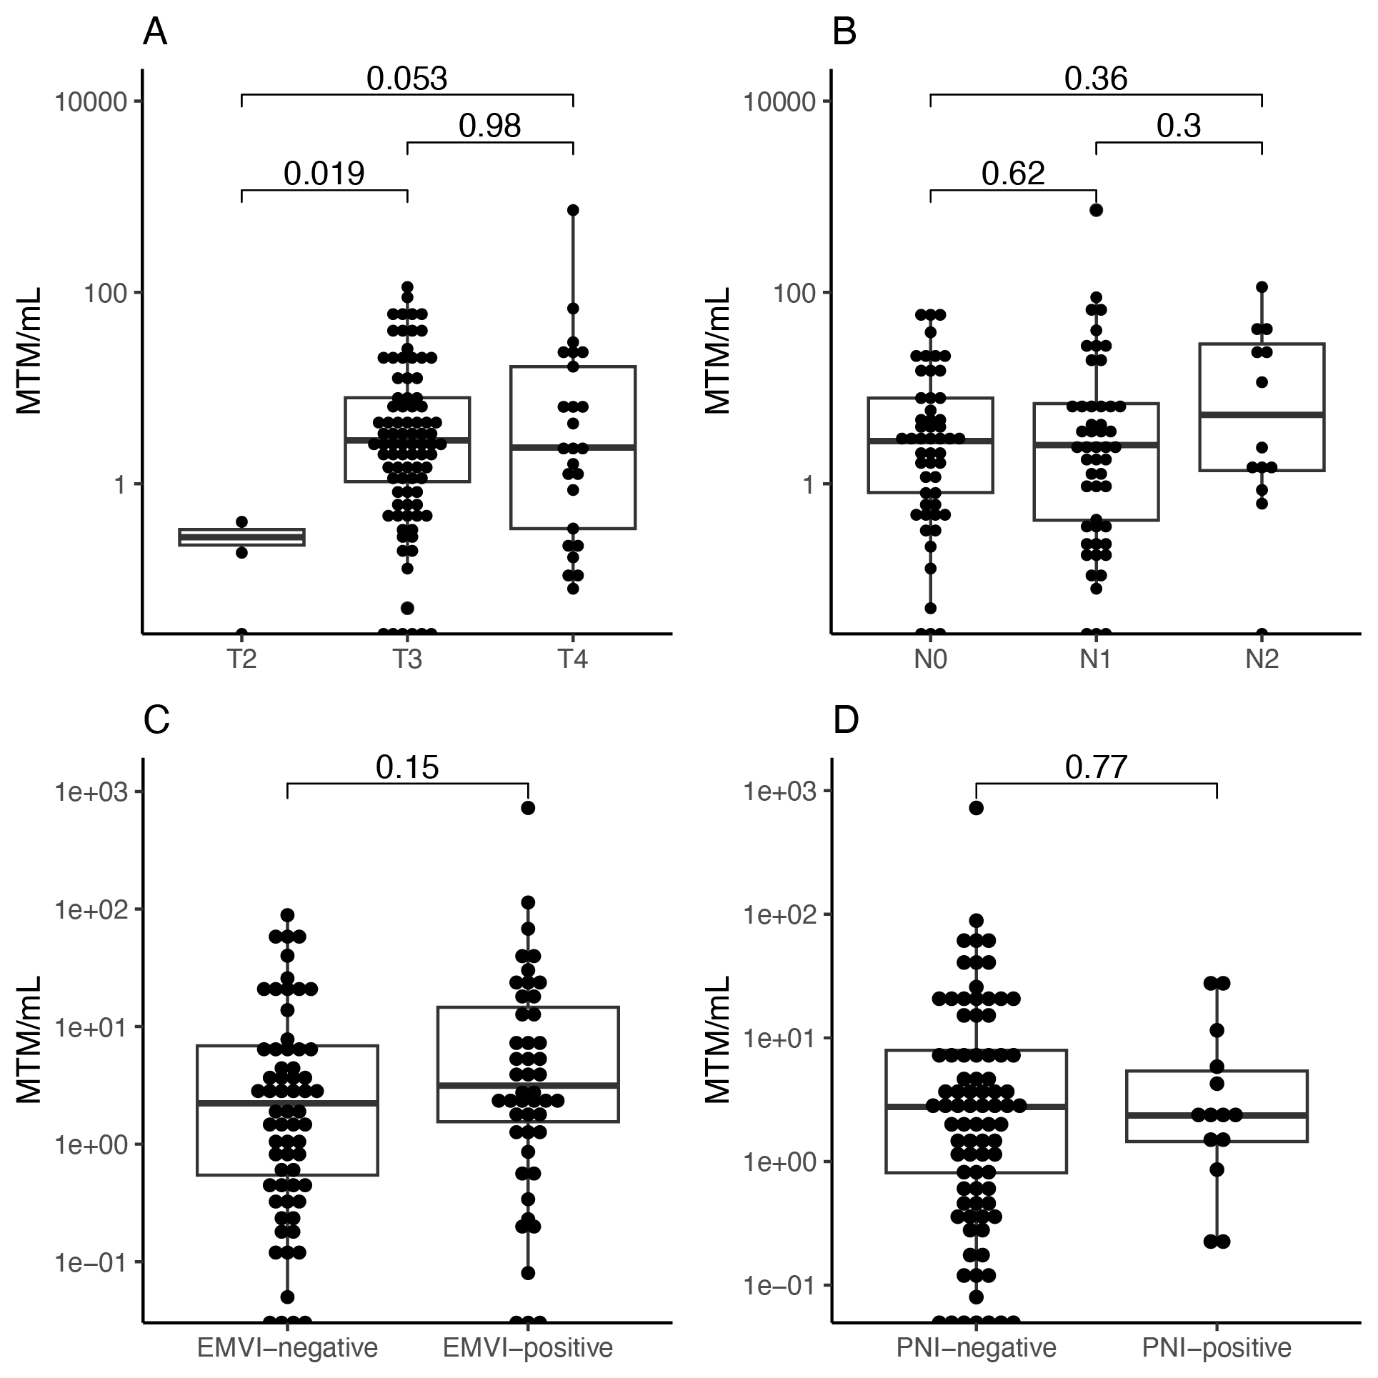
**

*EMVI, extramural venous invasion; MTM/ml, mean tumour molecules per millilitre; N, nodal; PNI, perineural invasion; T, tumour*

**Supplementary Figure 6: Mean ctDNA concentration at baseline,**  **MRD timepoint, and relapse**

**
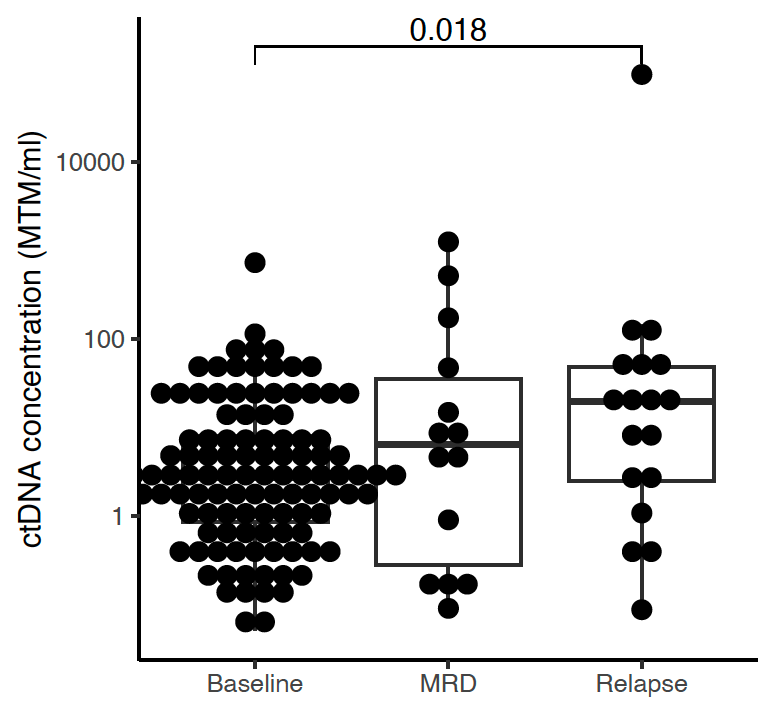
**

*MRD, minimal residual disease; MTM/ml, mean tumour molecules per millilitre*

**Supplementary Figure 7a: Recurrence sites by MRD in patients with rectal primary tumours (*n*=14)**


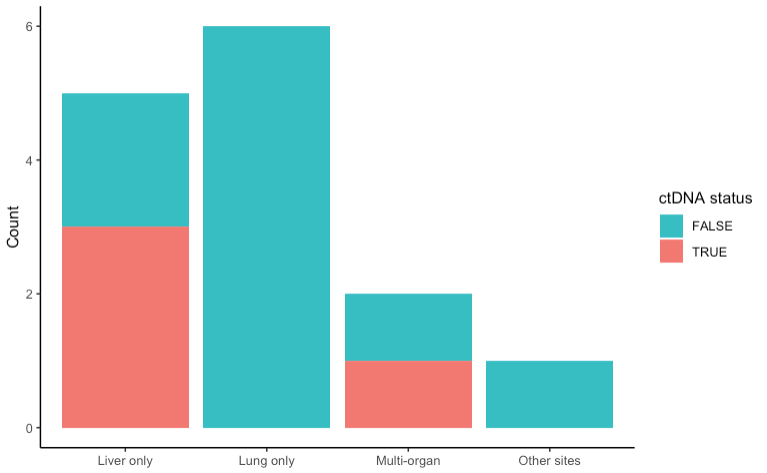


*MRD, minimal residual disease; MRDneg, minimal residual disease negative; MRDpos, minimal residual disease positive*

**Supplementary Figure 7b: Recurrence sites by MRD in patients with colon primary tumours (*n*=16)**


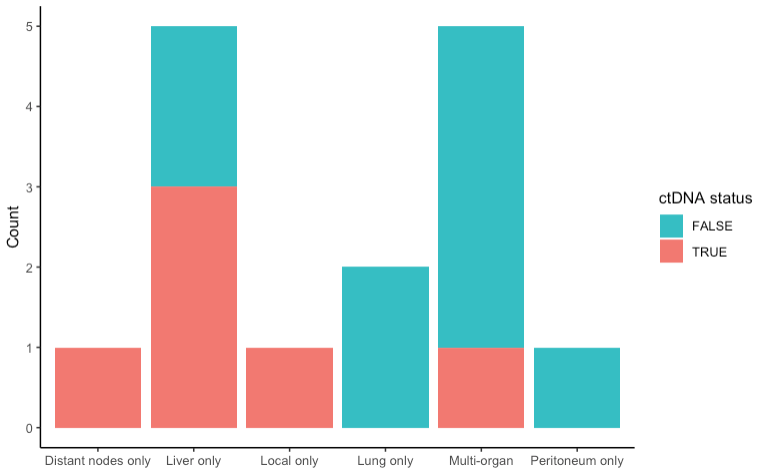


*MRD, minimal residual disease; MRDneg, minimal residual disease negative; MRDpos, minimal residual disease positive*

**Supplementary Figure 8: Time from first detected ctDNA level to recurrence by average fold change in ctDNA concentration per day (*n*=11)**


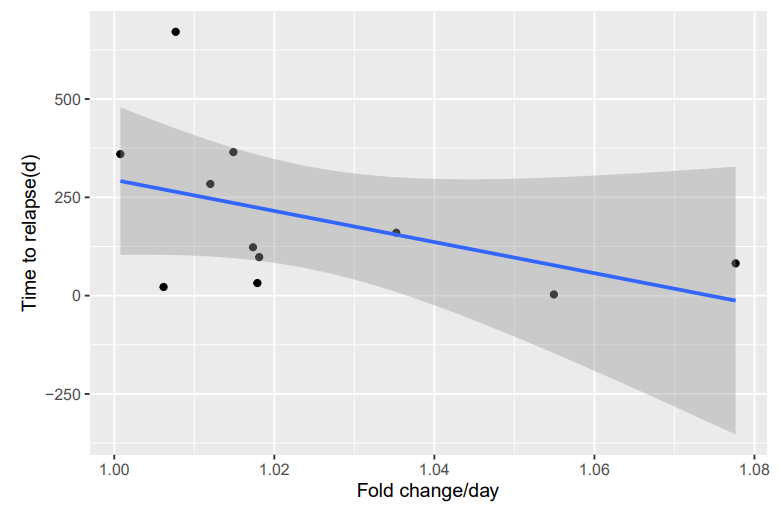


*D, day*

**Supplementary Figure 9a: Case vignette patient 83**
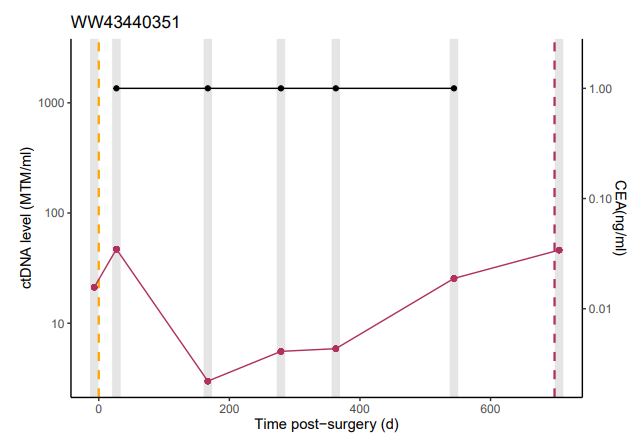


*Patient 83 had a colon primary tumour, treated with surgery alone, and recurred in the liver only.*

*CEA, carcinoembryonic antigen (CEA reference range: <4ug/L [non-smokers] <6ug/L [smokers]); D, day; MTM, mean tumour molecules*

**
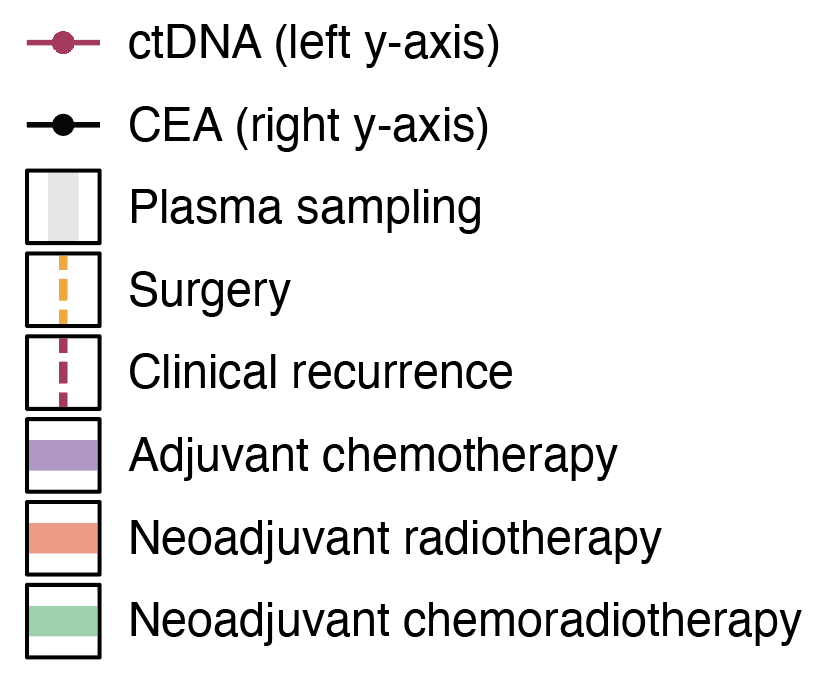
**

**Supplementary Figure 9b: Case vignette patient 13**


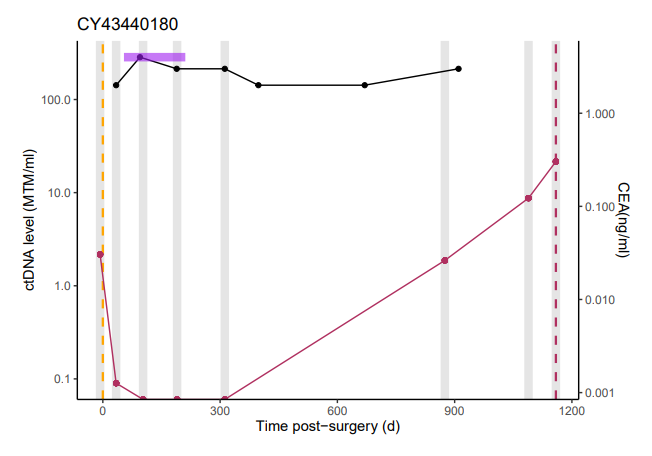


*Patient 13 had a rectal primary tumour, treated with surgery and adjuvant raltitrexed, and recurred in the liver only.*

*CEA, carcinoembryonic antigen (CEA reference range: <4ug/L [non-smokers] <6ug/L [smokers]); D, day; MTM, mean tumour molecules*

**
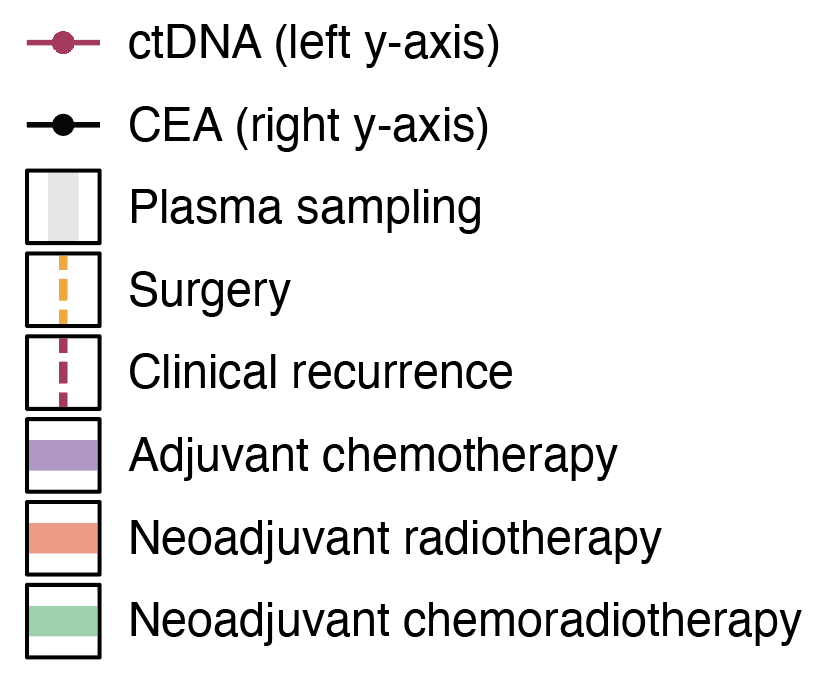
**

**Supplementary Figure 9c: Case vignette patient 70**


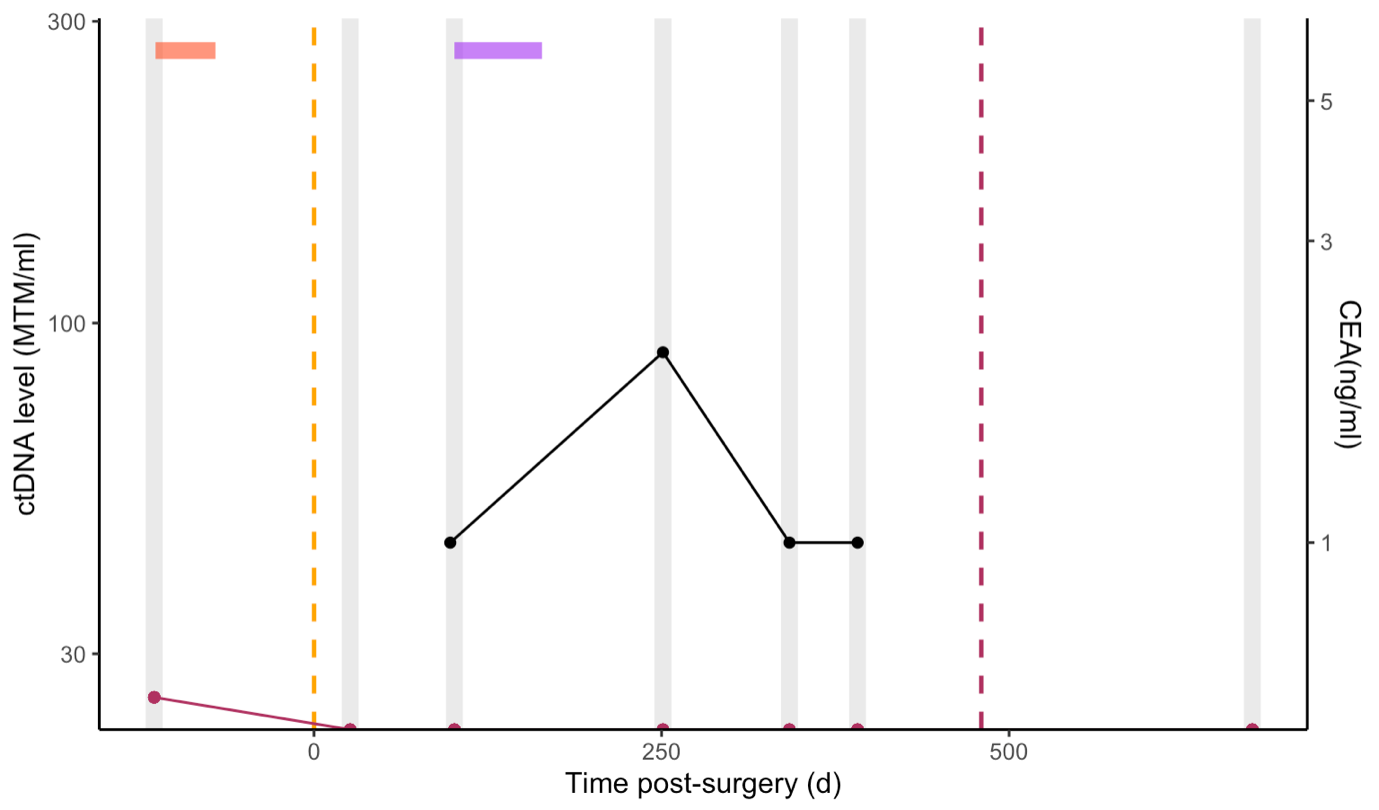


*Patient 70 had a rectal primary tumour, treated with neo-adjuvant CRT followed by surgery plus adjuvant CAPOX and recurred in the lung only.*

*CAPOX, capecitabine plus oxaliplatin; CEA, carcinoembryonic antigen (CEA reference range: <4ug/L [non-smokers] <6ug/L [smokers]); CRT, chemoradiotherapy; D, day; MTM, mean tumour molecules*

**
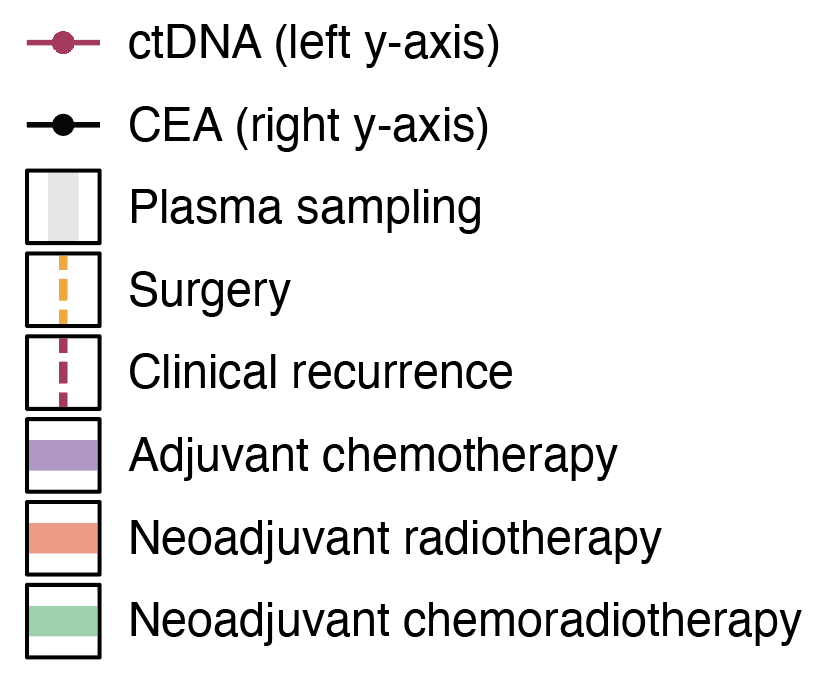
**

**Supplementary Figure 9d: Case vignette patient 72**


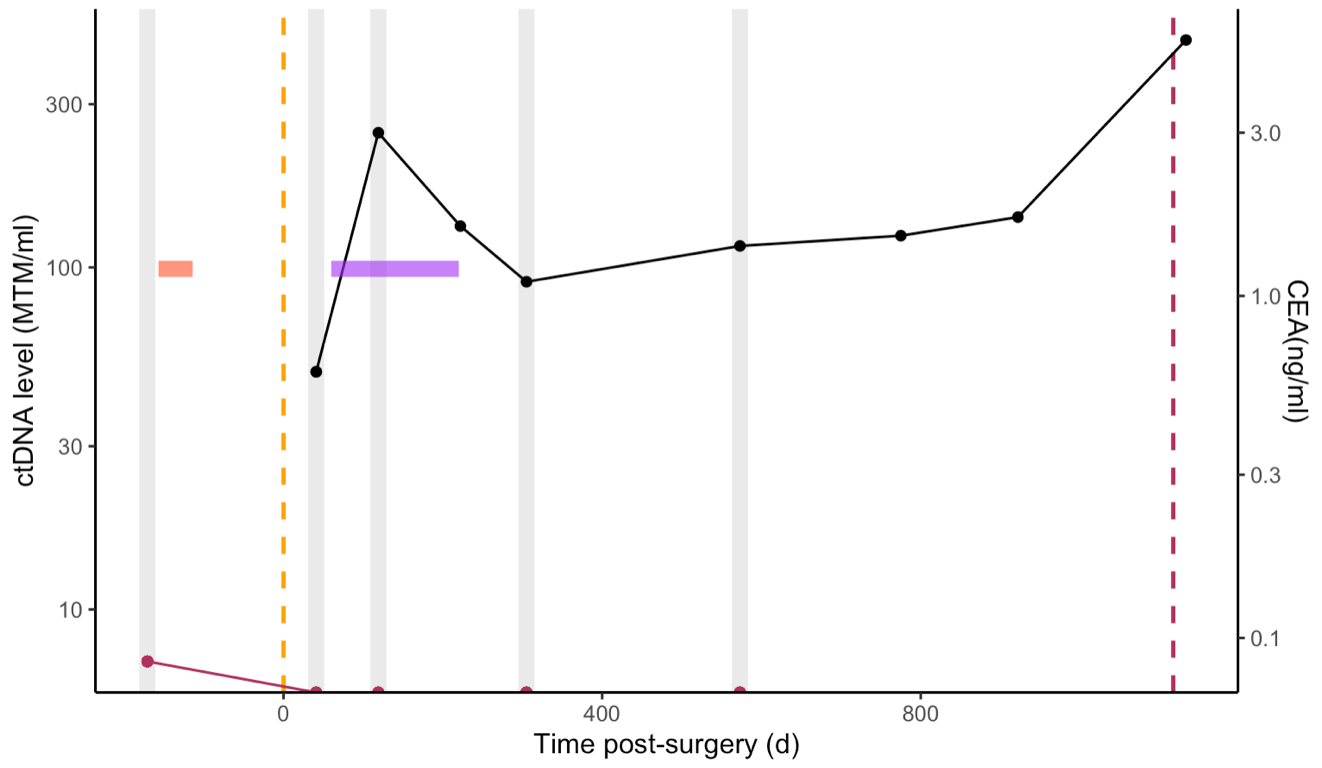


*Patient 72 had a rectal primary tumour, treated with neo-adjuvant CRT followed by surgery plus adjuvant capecitabine and recurred in the lung only.*

*CEA, carcinoembryonic antigen (CEA reference range: <4ug/L [non-smokers] <6ug/L [smokers]); CRT, chemoradiotherapy; D, day; MTM, mean tumour molecules*

**
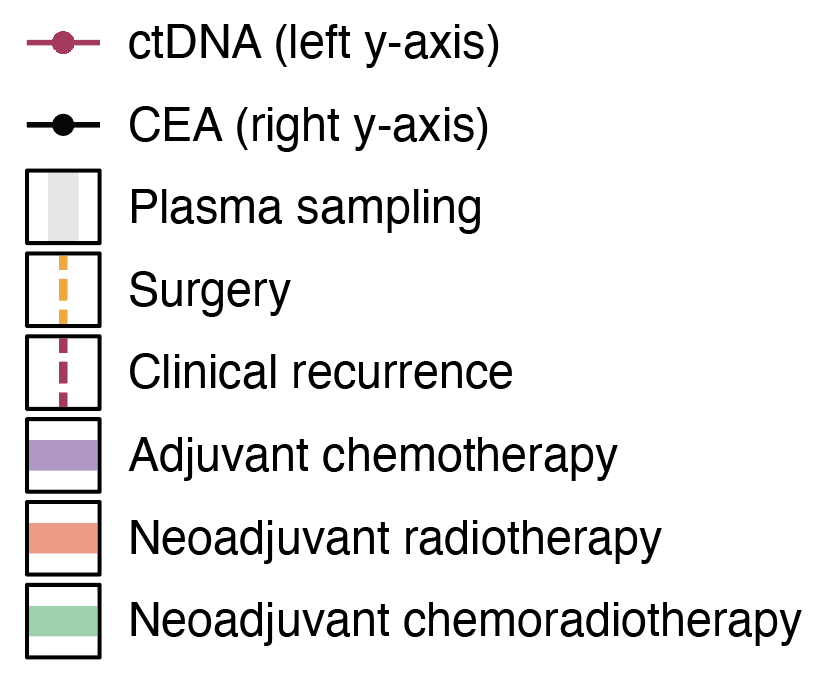
**

**Supplementary Figure 9e: Case vignette patient 62**


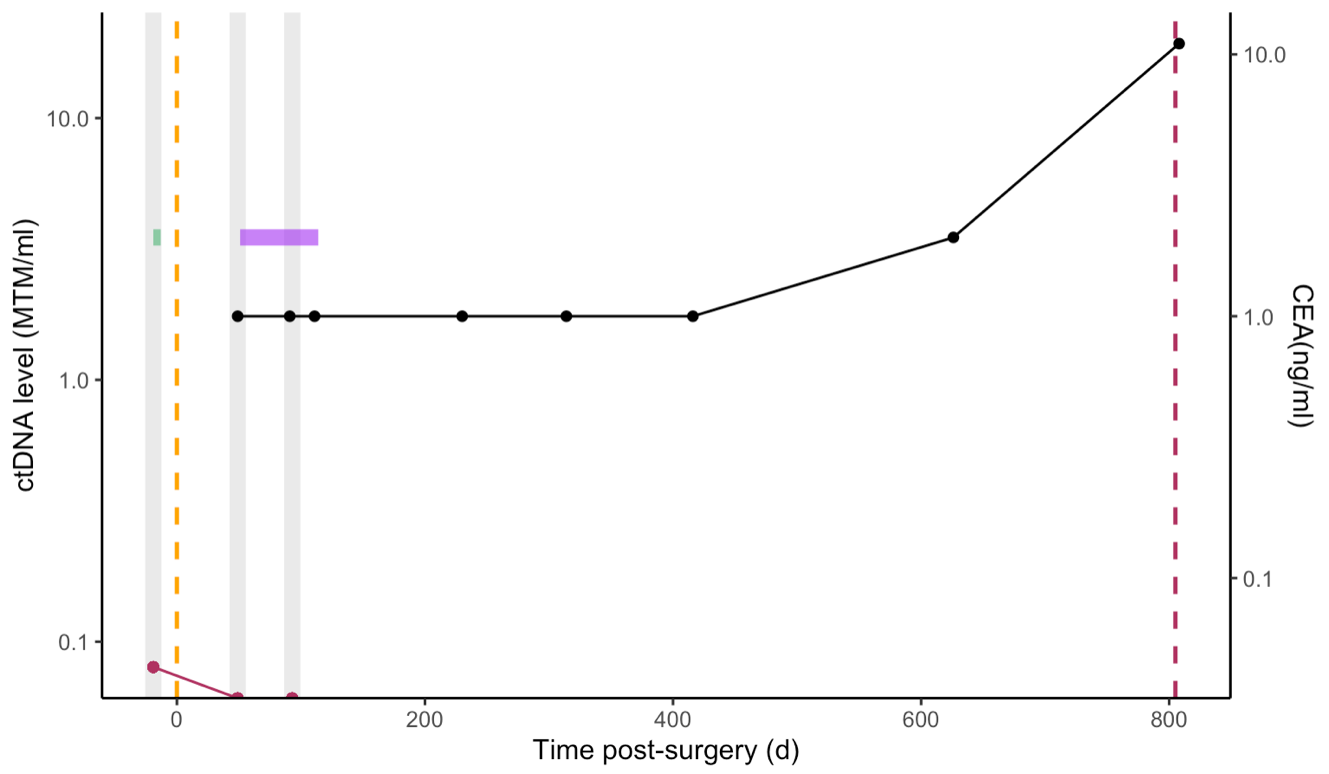


*Patient 62 had a rectal primary tumour, treated with neo-adjuvant RT followed by surgery plus adjuvant CAPOX and recurred in the rectum.*

*CAPOX, capecitabine plus oxaliplatin; CEA, carcinoembryonic antigen (CEA reference range: <4ug/L [non-smokers] <6ug/L [smokers]); D, day; MTM, mean tumour molecules; RT, radiotherapy*

**
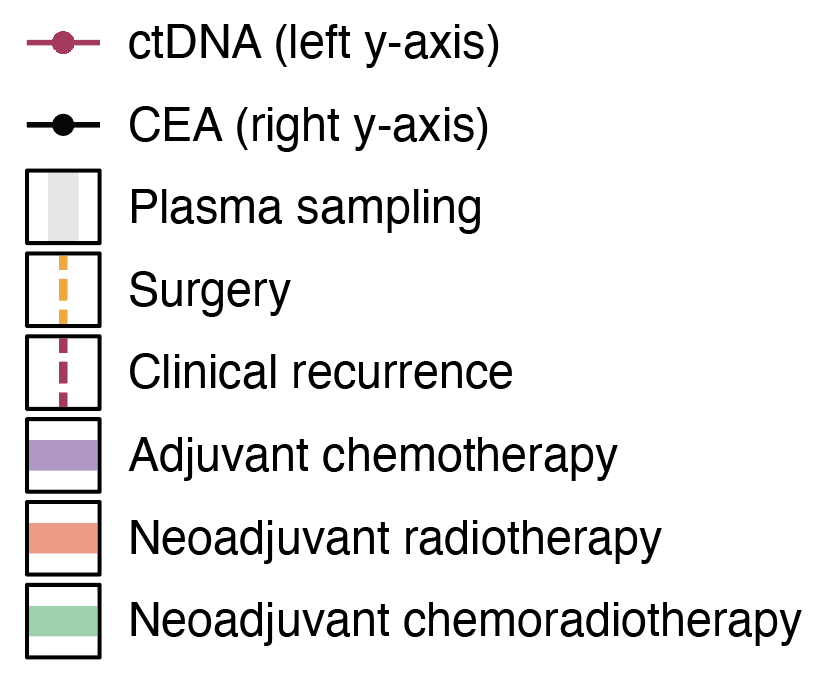
**

**Supplementary Figure 10: Cumulative incidence of positive ctDNA or CEA sample, stratified by eventual relapse.**

**
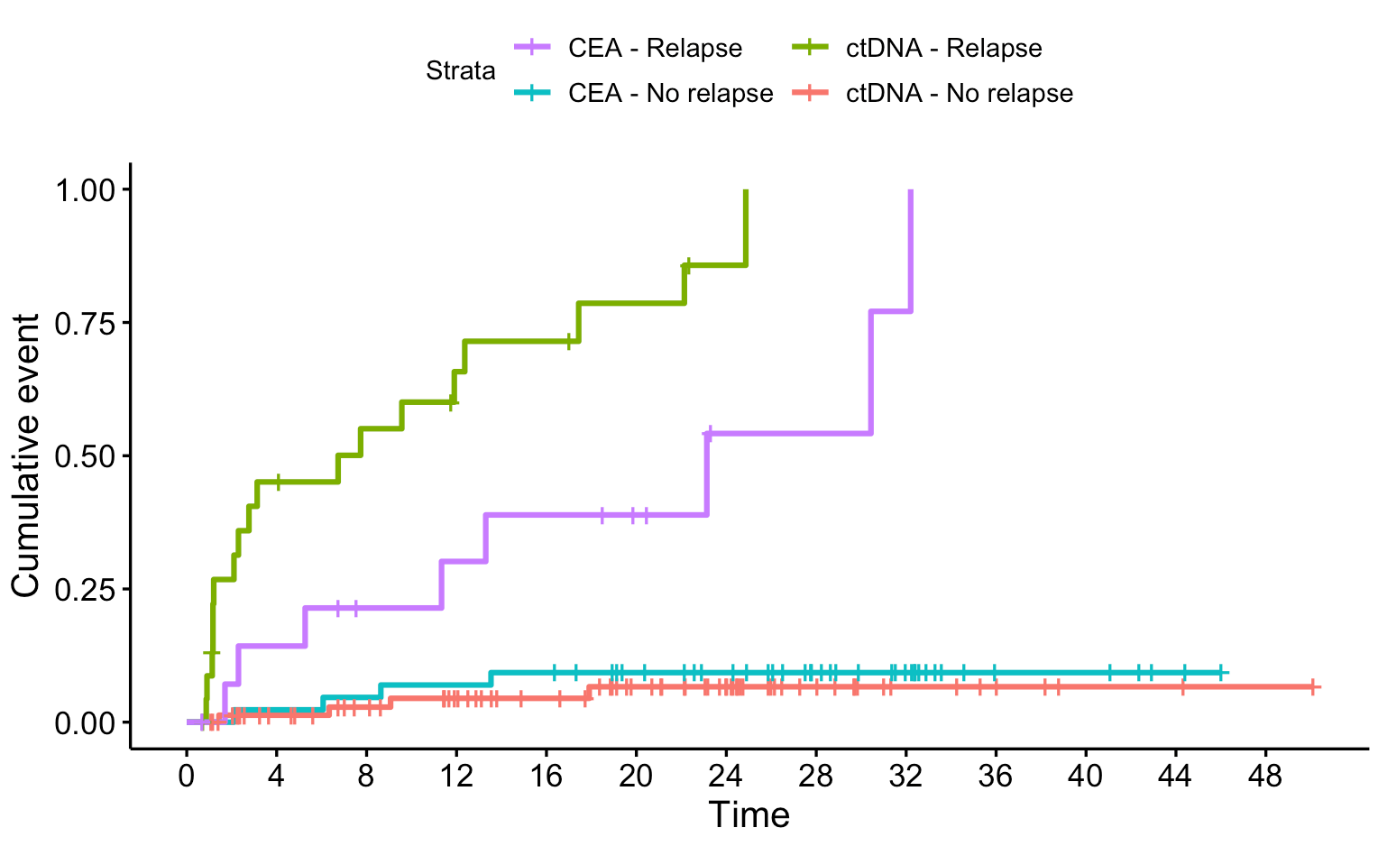
**

*CEA, carcinoembryonic antigen (CEA reference range: <4ug/L [non-smokers] <6ug/L [smokers])*

**Appendix 1: Principal Investigator of TRACC Part B Trial**

| Professor David Cunningham |
| --- |
| Dr Nicol George |
| Dr Graham Branagen |
| Dr Sarah Duff |
| Dr Gihan Ratnayake |
| Dr Joseph Huang |
| Dr Sorena Afshar |
| Dr Bryony Eccels |
| Dr Martin Scott-Brown |
| Dr Deborah Williamson |
| Dr Rajarshi Roy |
| Dr Shreerang Bhide |
| Mr Francesco Di Fabio |
| Dr Claire Hall |
| Dr Lucinda Melcher |
| Dr Mark Hill |
| Dr Sarah Slater |
| Dr Amelie Harle |
| Dr Sing Yu Moorcraft |
| Mr Nadeem Ashraf |
| Dr Stephen Falk |
| Mr Paris Tekkis |
| Dr Venkatesh Gajapathy |
| Dr Shazza Rehman |
| Dr Paul Ross |
| Dr Stergios Boussios |
| Dr Georgina Walker |
| Mr Nicholas West |
| Mr Muti Abulafi |
| Dr Sheela Rao |
| Dr Vanessa Potter |
| Dr Francisca Marti |
| Dr Ashraf Azzabi |
| Mr Jack Broadhurst |
| Dr Roshan Agarwal |
